# Supplementary material for: Non-redox metal ion promoted oxygen transfer by a non-heme manganese catalyst
Source: Royal Society of Chemistry journal article supplement (doi:10.1039/c4cc07981g), 2014-12-15
Supplement: c4cc07981g1.pdf [file c4cc07981g1.pdf]

# Supporting Information for

## Non-redox Metal Ions Promoted Oxygen Transfer by a Non-heme Manganese Catalyst

Zhuqi Chen, Ling Yang, Cholho Choe, Zhanao Lv, Guochuan Yin\*

School of Chemistry and Chemical Engineering, Key Laboratory for Large-Format Battery Materials and System, Ministry of Education, Huazhong University of Science and Technology, Wuhan 430074, PR China.

*Email: gyin@hust.edu.cn*

- 1) Experimental Section
- 2) Chemical structure of BPMEN and X-ray structure of Mn(BPMEN)Cl<sub>2</sub>.
- 3) GC-MS graph of catalytic epoxidation of cyclooctene
- 4) Influence of the Lewis acid concentration on the catalytic oxidation of cyclooctene to 1,2-epoxyoctane.
- 5) Catalytic epoxidation of *cis*-stilbene by the manganese(II) complex alone
- 6) Sc(OTf)<sub>3</sub> promoted catalytic olefin epoxidations by the manganese(II) complex
- 7) Lewis acid accelerated epoxidation kinetics by the manganese(II) complex.
- 8) EPR spectra of the manganese (II) complex in the presence/absence of Sc(OTf)<sub>3</sub>.
- 9) EPR spectra of the manganese(II) complex with PhI(OAc)<sub>2</sub> in the presence/absence of Lewis acids.
- 10) CV spectra of the manganese(II) complex in the presence/absence of Sc(OTf)<sub>3</sub> and PhI(OAc)<sub>2</sub>
- 11) Reduction potential of the manganese(II) complex with PhI(OAc)<sub>2</sub> in the presence/absence of Sc(OTf)<sub>3</sub>.
- 12) FTIR spectra of the manganese(II) complex in the presence/absence of Sc(OTf)<sub>3</sub> and PhI(OAc)<sub>2</sub>.
- 13) UV-Vis spectra of the manganese(II) complex in the presence/absence of Sc(OTf)<sub>3</sub> and PhI(OAc)<sub>2</sub>.
- 14) Influence of water concentration on the epoxidation of *cis* and *trans*-stilbene by the manganese(II) complex and Lewis acid
- 15) GC-MS graph of H<sub>2</sub><sup>18</sup>O labeled catalytic *cis*-stilbene epoxidation by the manganese(II) complex and Sc(OTf)<sub>3</sub>

### Experimental Section

Iodobenzene diacetate ( $\text{PhI}(\text{OAc})_2$ ), sodium trifluoromethanesulfonate ( $\text{NaOTf}$ ), magnesium trifluoromethanesulfonate ( $\text{Mg}(\text{OTf})_2$ ), and scandium trifluoromethanesulfonate ( $\text{Sc}(\text{OTf})_3$ ) came from Aldrich. Other trifluoromethanesulfonates including  $\text{Ca}(\text{OTf})_2$ ,  $\text{Al}(\text{OTf})_3$ ,  $\text{Y}(\text{OTf})_3$  and  $\text{Yb}(\text{OTf})_3$  came from local chemical companies. Cyclooctane and other olefins as well as 1,2-epoxycyclooctane and other epoxides were purchased from either Aldrich or Alfa Aesar.  $\text{H}_2^{18}\text{O}$  (90%  $^{18}\text{O}$  atom) came from Acros. The manganese(II) complex,  $\text{Mn}(\text{BPMEN})\text{Cl}_2$ , was synthesized according to the literature, and the crystals of the manganese(II) complex were collected and employed as the catalyst in olefin epoxidation.<sup>1</sup> To confirm the correct synthesis of this complex, we also collected its X-ray structure data as shown in Scheme S1.

UV-Vis spectra were collected on Analytik jena, specord 205. GC-MS analysis was performed on Agilent7890A/5975C. FTIR spectra were collected on Bruker VERTEX70. Electrochemical studies were performed on a CS Corrtest electrochemical workstation equipped with glassy carbon as both working and counter electrodes and saturated calomel as reference electrode, and the redox potentials were measured under argon in dry acetonitrile with 0.1 M tetrabutylammonium perchlorate as the supporting electrolyte. EPR experiments were conducted on Bruker A200 at 130 K, with center field of 3352.488 G, frequency of 9.395 GHz, power of 19.44 mW, modulation amplitude of 2.00 G and receiver gain of  $1.00 \times 10^3$ .

**General procedure for the Lewis acid promoted catalytic epoxidation by the manganese(II) complex:** 0.1 M olefin, 1 mM manganese(II) complex and 2 mM Lewis acid were dissolved in 4 mL of acetone and 1 mL of  $\text{CH}_2\text{Cl}_2$ , then 1 mmol of  $\text{PhI}(\text{OAc})_2$  was added into this solution. The reaction solution was stirred in an ice-water bath at 273 K for 2 h. Yield of epoxide and conversion of olefin were quantitatively analyzed by GC using the internal standard method. Control experiments with the manganese(II) complex or Lewis acid alone as catalyst were carried out in parallel. Reactions were performed at least in duplicate, and average data were used in discussion.

**General procedure for Lewis acid promoted catalytic epoxidation of *cis* and *trans*-stilbene by the manganese(II) complex:** 0.1 M olefin, 1 mM manganese(II) complex and 2 mM  $\text{Sc}(\text{OTf})_3$  were dissolved in 4 mL of acetone and 1 mL of  $\text{CH}_2\text{Cl}_2$ , then 1 mmol of  $\text{PhI}(\text{OAc})_2$  was added into this solution. The reaction solution was stirred in an ice-water bath at 273 K for 4 h. Yield of epoxide and conversion of olefin were quantitatively analyzed by HPLC using the

internal standard method. Control experiments with the manganese(II) complex or Lewis acid alone as catalyst were carried out in parallel. Reactions were performed at least in duplicate, and average data were used in the discussion.

**General procedure for Lewis acid promoted catalytic epoxidation by the manganese(II) complex with water:** 0.05 M olefin, 1 mM manganese(II) complex and 2 mM Sc(OTf)<sub>3</sub> were dissolved in 0.4 mL of acetone, 0.1 mL of CH<sub>2</sub>Cl<sub>2</sub> and a certain amount of water. Then 0.05 mmol of Phi(OAc)<sub>2</sub> were added into this solution. The reaction solution was stirred in an ice-water bath at 273 K for 8 h. Product analysis was performed by HPLC using the internal standard method. Control experiments with the manganese(II) complex or Lewis acid alone as catalyst were carried out in parallel. Reactions were performed at least in duplicate, and average data were used in the discussion.

**Isotope-labelled epoxidation with H<sub>2</sub><sup>18</sup>O:** 0.05 M olefin, 1 mM manganese(II) complex and 2 mM Sc(OTf)<sub>3</sub> were dissolved in 0.4 mL of acetone and 0.1 mL of CH<sub>2</sub>Cl<sub>2</sub>, then 0.1 mL H<sub>2</sub><sup>18</sup>O (90% <sup>18</sup>O enrichment as received) and 0.05 mmol of Phi(OAc)<sub>2</sub> were added. The reaction mixture was stirred in an ice-water bath at 273 K for 8 hours. The <sup>18</sup>O enrichments are calculated based on the peak abundances of <sup>16</sup>O- and <sup>18</sup>O-epoxide in GC-MS graphs

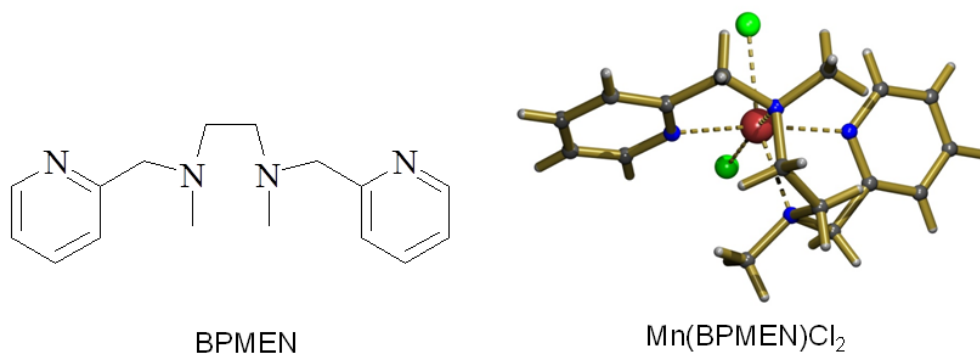

**Scheme S1** Chemical structure of BPMEN and X-ray structure of Mn(BPMEN)Cl<sub>2</sub>.<sup>[1]</sup>

**Reference:**

- [1] C. Hureau, G. Blondin, M. F. Charlot, C. Philouze, M. Nierlich, M. Cesario, E. Anxolabehere-Mallart, *Inorg. Chem.* **2005**, *44*, 3669

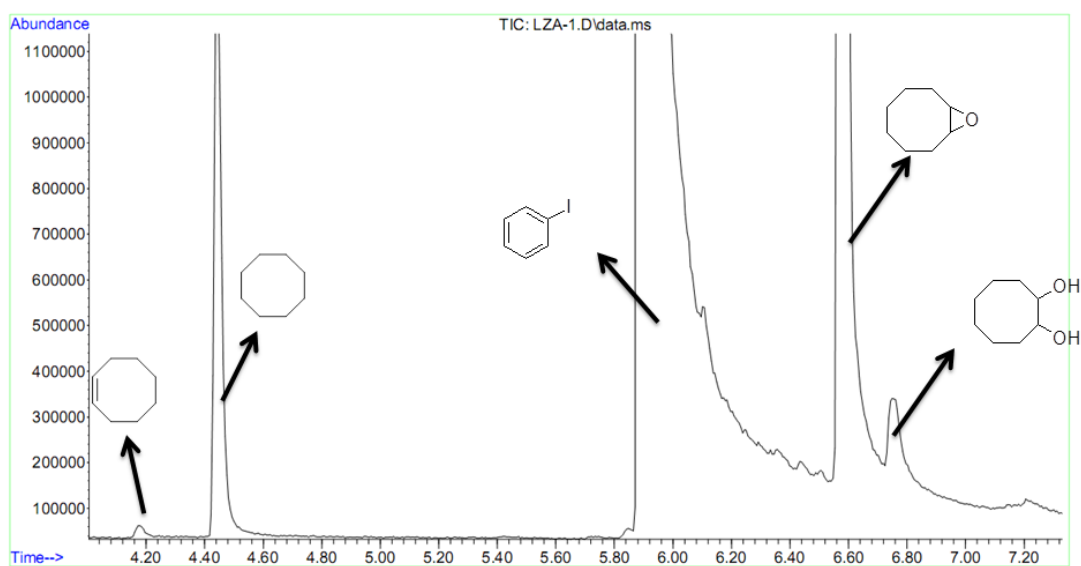

**Figure S1** Enlarged GC-MS graph of catalytic epoxidation of cyclooctene by the manganese(II) complex and  $\text{Al}(\text{OTf})_3$  to illustrate trace 1,2-cyclooctanediol product. Conditions: acetone 4 mL,  $\text{CH}_2\text{Cl}_2$  1 mL, olefin 0.1 M, manganese(II) complex 1 mM,  $\text{Al}(\text{OTf})_3$  2 mM,  $\text{PhI}(\text{OAc})_2$  0.2 M, 273 K, 2 h.

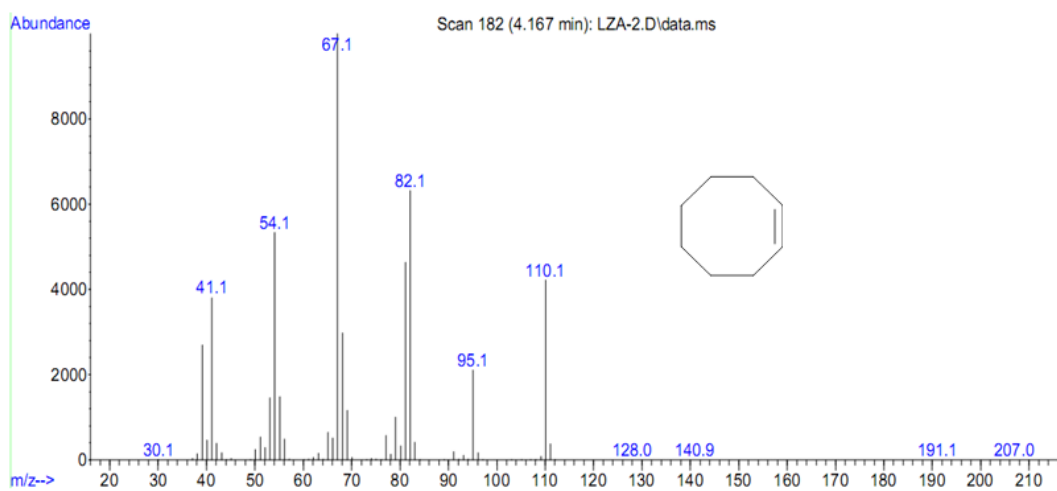

**Figure S1-1** MS graph of cyclooctene from catalytic epoxidation of cyclooctene by the manganese(II) complex and  $\text{Al}(\text{OTf})_3$ .

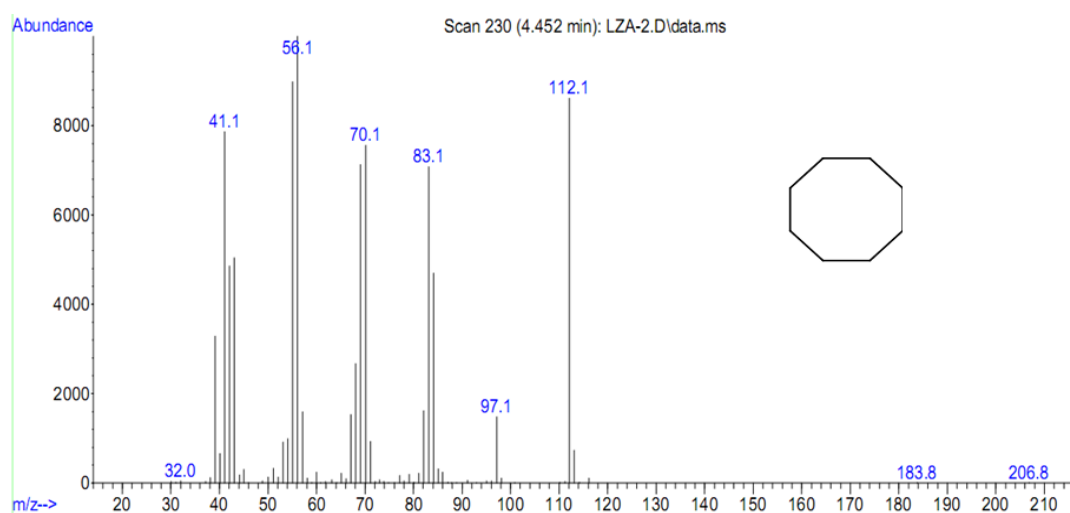

**Figure S1-2** MS graph of cyclooctane from catalytic epoxidation of cyclooctene by the manganese(II) complex and  $\text{Al}(\text{OTf})_3$ .

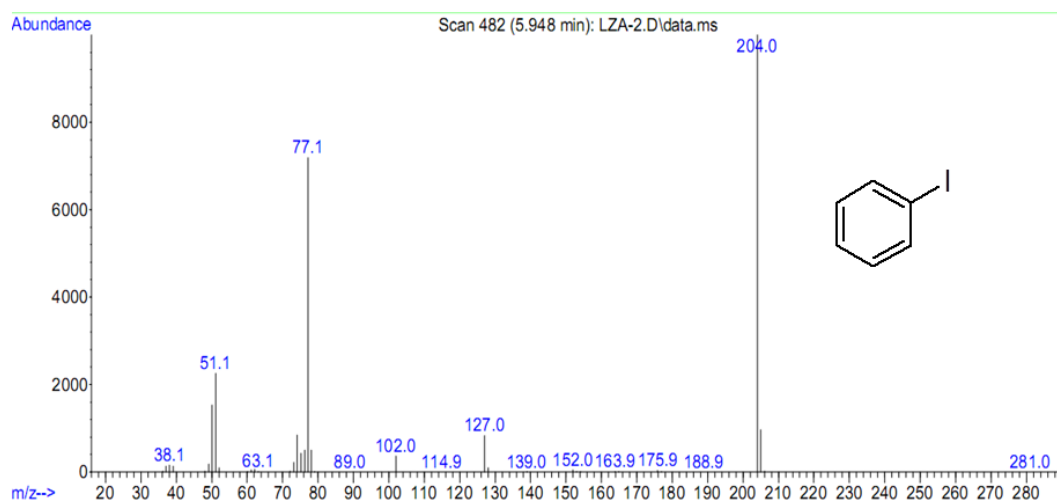

**Figure S1-3** MS graph of iodobenzene from catalytic epoxidation of cyclooctene by the manganese(II) complex and  $\text{Al}(\text{OTf})_3$ .

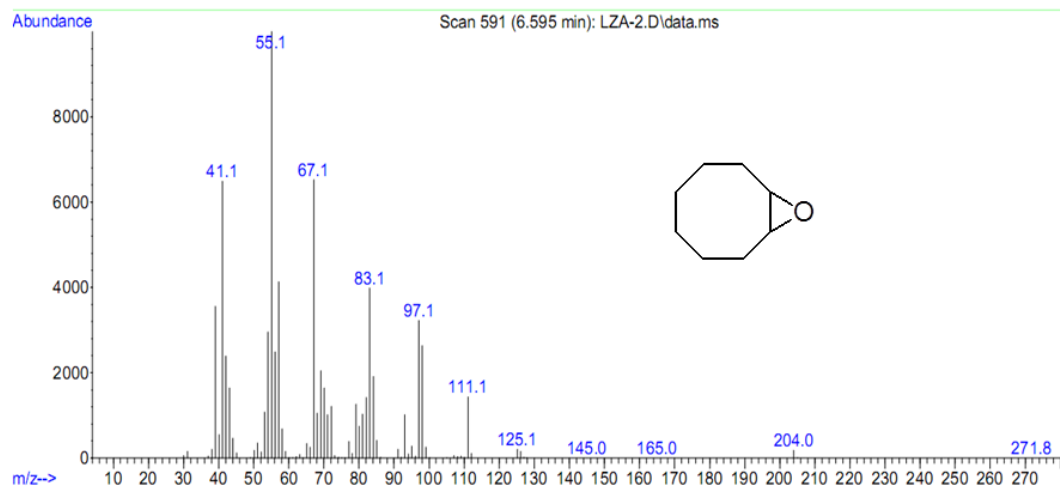

**Figure S1-4** MS graph of cyclooctene oxide from catalytic epoxidation of cyclooctene by the manganese(II) complex and  $\text{Al}(\text{OTf})_3$ .

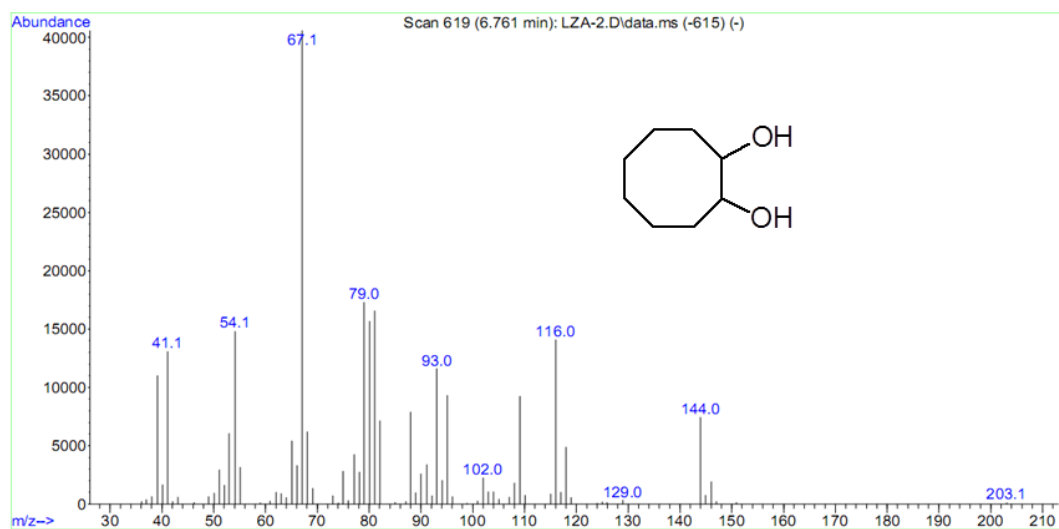

**Figure S1-5** MS graph of 1,2-cyclooctanediol from catalytic epoxidation of cyclooctene by the manganese(II) complex and  $\text{Al}(\text{OTf})_3$ .

**Table S1** Influence of the Lewis acid concentration on the catalytic oxidation of cyclooctene to 1,2-epoxyoctane

| Mn(BPMEN)Cl <sub>2</sub> | Sc(OTf) <sub>3</sub> | Conversion (%) | Yield (%) |
|--------------------------|----------------------|----------------|-----------|
| 0                        | 0                    | 4.8            | 1.8       |
| 1                        | 0                    | 7.6            | 6.4       |
| 0                        | 2                    | 4.6            | 2.9       |
| 1                        | 0.5                  | 39.3           | 27.4      |
| 1                        | 1                    | 96.4           | 77.7      |
| 1                        | 2                    | 100            | 94.4      |
| 1                        | 4                    | 100            | 77.6      |

Conditions: solvent 5 mL acetone/CH<sub>2</sub>Cl<sub>2</sub> (4:1, v/v), cyclooctene 0.1 M, manganese(II) complex 1 mM, Sc(OTf)<sub>3</sub> 2 mM, PhI(OAc)<sub>2</sub> 0.2 M, 273 K, 2 h.



**Table S2** Catalytic epoxidation of *cis*-stilbene by the manganese(II) complex alone

| Sub.:Cat. | Conv. (%) | Yield- <i>cis</i> (%) | Yield- <i>trans</i> (%) | Yield-benzaldehyde (%) |
|-----------|-----------|-----------------------|-------------------------|------------------------|
| 100:1     | 7.9       | 1.7                   | 1.4                     | 3.7                    |
| 50:1      | 15.8      | 3.6                   | 3.2                     | 5.3                    |
| 25:1      | 23.1      | 5.4                   | 5.9                     | 6.0                    |

Conditions: solvent 5 mL acetone/CH<sub>2</sub>Cl<sub>2</sub> (4:1, v/v), cyclooctene 0.1 M, manganese(II) complex 1 mM, PhI(OAc)<sub>2</sub> 0.2 M, 273 K, 8 h.

**Table S3** Sc(OTf)<sub>3</sub> promoted catalytic olefin epoxidations by the manganese(II) complex

| Substrate              | Product               | Conversion (%)   |                  |                                        | Yield (%)        |                  |                                        |
|------------------------|-----------------------|------------------|------------------|----------------------------------------|------------------|------------------|----------------------------------------|
|                        |                       | Mn <sup>2+</sup> | Sc <sup>3+</sup> | Mn <sup>2+</sup> plus Sc <sup>3+</sup> | Mn <sup>2+</sup> | Sc <sup>3+</sup> | Mn <sup>2+</sup> plus Sc <sup>3+</sup> |
| cyclooctene            | 1,2-epoxycyclooctene  | 7.6              | 4.6              | 100                                    | 6.4              | 2.9              | 94.4                                   |
| cyclohexene            | 1,2-epoxycyclohexane  | 14.9             | 16.3             | 98.2                                   | 6.5              | 2.6              | 74.9                                   |
| norborylene            | 2,3-epoxynorbornene   | 10.7             | 5.1              | 93.8                                   | 10.1             | 3.0              | 81.5                                   |
| 1-hexene               | 1,2-epoxyhexane       | 19.9             | 0.9              | 85.3                                   | 3.6              | 0.3              | 69.5                                   |
| 1-dodecene             | 1,2-epoxydecane       | 13.0             | 9.3              | 76.2                                   | 2.2              | 3.2              | 70.8                                   |
| <i>trans</i> -stilbene | <i>cis</i> -epoxide   | 17.5             | 9.9              | 97.5                                   | 0                | 0                | 0                                      |
|                        | <i>trans</i> -epoxide |                  |                  |                                        | 10.8             | 0                | 41.4                                   |
|                        | benzaldehyde          |                  |                  |                                        | 6.4              | 5.2              | 18.6                                   |
| <i>cis</i> -stilbene   | <i>cis</i> -epoxide   | 7.9              | 5.0              | 90.1                                   | 1.7              | 0                | 52.1                                   |
|                        | <i>trans</i> -epoxide |                  |                  |                                        | 1.4              | 0                | 2.7                                    |
|                        | benzaldehyde          |                  |                  |                                        | 3.7              | 3.0              | 18.7                                   |

Conditions: solvent 5 mL acetone/CH<sub>2</sub>Cl<sub>2</sub> (4:1, v/v), olefin 0.1 M, manganese(II) complex 1 mM, Sc(OTf)<sub>3</sub> 2 mM, PhI(OAc)<sub>2</sub> 0.2 M, 273 K.

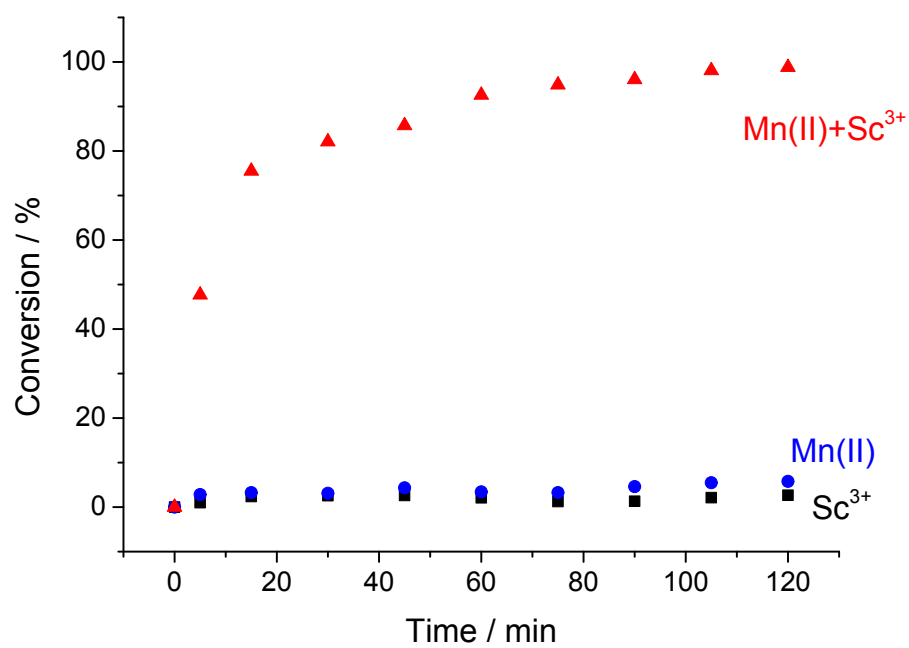

**Figure S2** Lewis acid accelerated epoxidation kinetics by the manganese(II) complex. Conditions: solvent 5 mL acetone/CH<sub>2</sub>Cl<sub>2</sub> (4:1, v/v), cyclooctene 0.1 M, manganese(II) complex 1 mM, Sc(OTf)<sub>3</sub> 2 mM, PhI(OAc)<sub>2</sub> 0.2 M, 273 K.

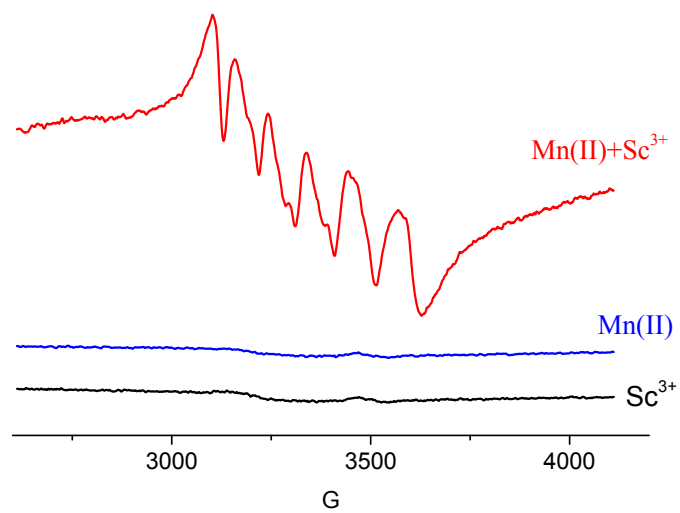

**Figure S3** EPR spectra of the manganese(II) complex in acetone/ $\text{CH}_2\text{Cl}_2$  mixture (4:1, v/v) at 130 K. Conditions: manganese(II) complex 5 mM, one equiv. of  $\text{Sc}(\text{OTf})_3$ .

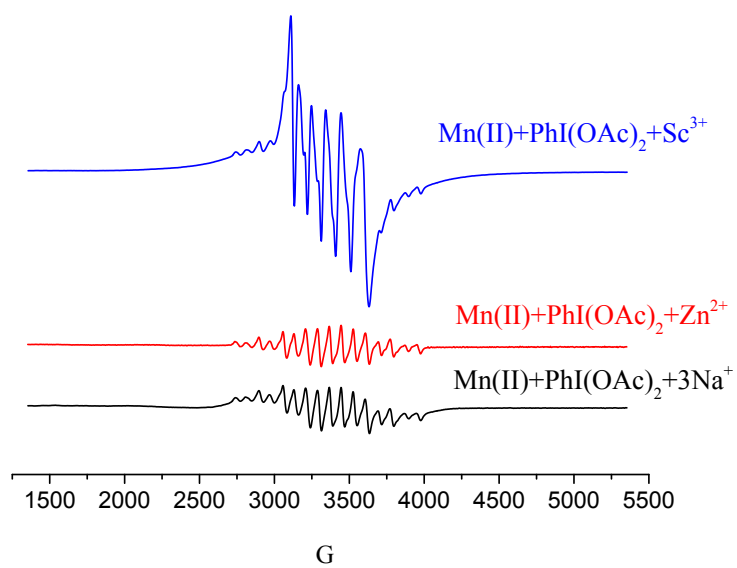

**Figure S4** EPR spectra of the manganese(II) complex in acetone/ $\text{CH}_2\text{Cl}_2$  mixture (4:1, v/v) at 130 K. Conditions: manganese(II) complex 5 mM, 5 equiv. of  $\text{PhI(OAc)}_2$ , one equiv. of  $\text{Sc(OTf)}_3$ , one equiv. of  $\text{Zn(OTf)}_2$ , or 3 equiv. of  $\text{Na(OTf)}$ .

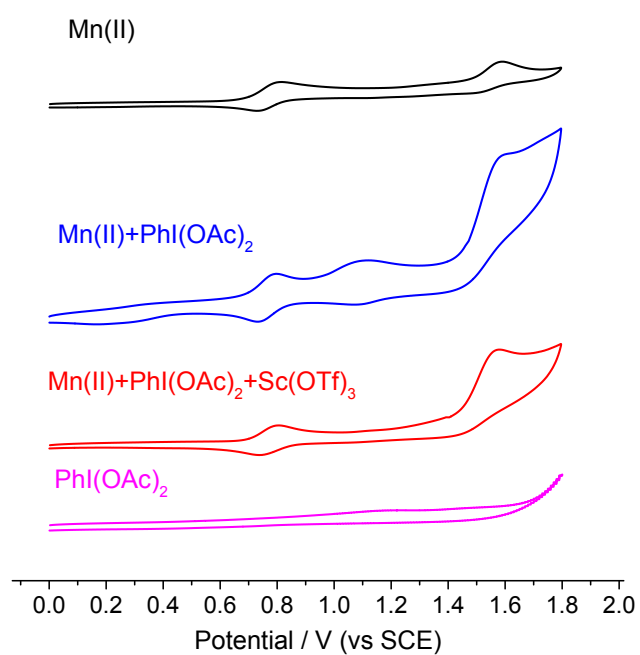

Figure S5 Cyclic voltammograms of Mn(BPMEN)Cl<sub>2</sub> in the presence/absence of PhI(OAc)<sub>2</sub> and Sc(OTf)<sub>3</sub> in acetone/CH<sub>2</sub>Cl<sub>2</sub> mixture (4:1, v/v). Conditions: Mn(BPMEN)Cl<sub>2</sub> 5 mM, one equiv. of Sc(OTf)<sub>3</sub>, 5 equiv. of PhI(OAc)<sub>2</sub>, 0.1 M tetrabutylammonium perchlorate as the supporting electrolyte.

**Table S5** Reduction potential of the manganese(II) complex with PhI(OAc)<sub>2</sub> in the presence/absence of Sc(OTf)<sub>3</sub>. [a]

|                                                                                                                            | Mn(II)/Mn(III) | Mn(III)/Mn(IV) | Mn <sub>2</sub> (III,IV)/<br>Mn <sub>2</sub> (IV,IV) |
|----------------------------------------------------------------------------------------------------------------------------|----------------|----------------|------------------------------------------------------|
| Mn(BPMEN)Cl <sub>2</sub>                                                                                                   | 0.76           | 1.56           |                                                      |
| Mn(BPMEN)Cl <sub>2</sub> +PhI(OAc) <sub>2</sub>                                                                            | 0.76           | 1.52           | 1.10                                                 |
| Mn(BPMEN)Cl <sub>2</sub> +PhI(OAc) <sub>2</sub> +Sc(OTf) <sub>3</sub>                                                      | 0.76           | 1.53           |                                                      |
| Mn <sup>III</sup> (μ-O) <sub>2</sub> Mn <sup>IV</sup> (BPMEN) <sub>2</sub> (ClO <sub>4</sub> ) <sub>3</sub> <sup>[b]</sup> |                |                | 1.12                                                 |
| Mn(BPMEN)Cl <sub>2</sub> <sup>[b]</sup>                                                                                    | 0.74           | 1.46           |                                                      |

[a] Potentials are given in volts vs SCE. Conditions: manganese(II) complex 5 mM in acetone/CH<sub>2</sub>Cl<sub>2</sub> mixture (4:1, v/v) at 130 K, 5 equiv. of PhI(OAc)<sub>2</sub>, 2 equiv. of Sc(OTf)<sub>3</sub>. [b] the data from ref. 2.

**Reference:**

[2] C. Hureau, G. Blondin, M. F. Charlot, C. Philouze, M. Nierlich, M. Cesario, E. Anxolabehere-Mallart, *Inorg. Chem.* **2005**, *44*, 3669.

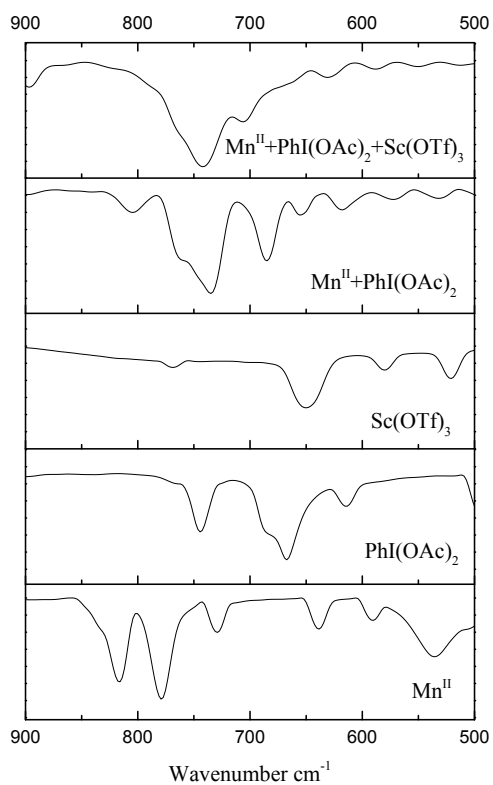

**Figure S6** FTIR spectra of the manganese(II) complex in the presence/absence of  $\text{Sc}(\text{OTf})_3$  and  $\text{PhI}(\text{OAc})_2$  in acetone/ $\text{CH}_2\text{Cl}_2$  mixture (4:1, v/v). Conditions: manganese(II) complex 5 mM, one equiv. of  $\text{Sc}(\text{OTf})_3$ , 5 equiv. of  $\text{PhI}(\text{OAc})_2$ .



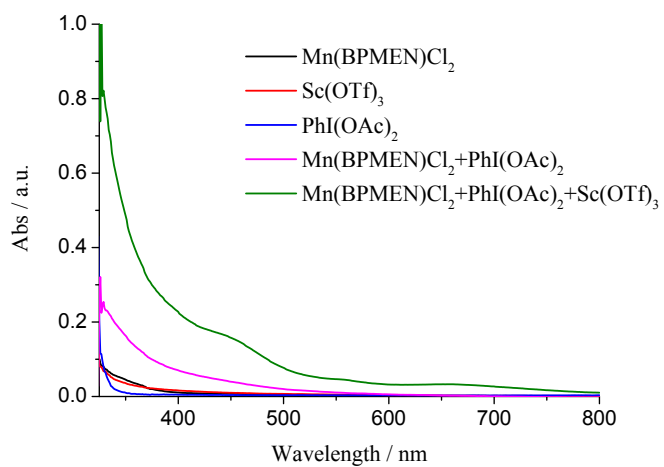

**Figure S7** UV-Vis spectra of the manganese(II) complex in the presence/absence of Sc(OTf)<sub>3</sub> and PhI(OAc)<sub>2</sub> in acetone/CH<sub>2</sub>Cl<sub>2</sub> mixture (4:1, v/v). Conditions: manganese(II) complex 0.25 mM, one equiv. of Sc(OTf)<sub>3</sub>, 5 equiv. of PhI(OAc)<sub>2</sub>.

**Table S6** Influence of water concentration on the epoxidation of *cis* and *trans*-stilbene by the manganese(II) complex and Lewis acid

| Substrate              | Water (mL) | Conversion (%) | Yield                  |                          | Yield           |
|------------------------|------------|----------------|------------------------|--------------------------|-----------------|
|                        |            |                | <i>cis</i> -epoxide(%) | <i>trans</i> -epoxide(%) | benzaldehyde(%) |
| <i>cis</i> -stilbene   | 0          | 90.1           | 52.1                   | 2.7                      | 18.7            |
|                        | 0.01       | 86.3           | 41.4                   | 5.3                      | 9               |
|                        | 0.02       | 76.8           | 14                     | 2.6                      | 9.3             |
|                        | 0.05       | 63.4           | 11.8                   | 2.2                      | 11.3            |
|                        | 0.1        | 70.7           | 11.8                   | 4                        | 8.7             |
| <i>trans</i> -stilbene | 0          | 97.5           | 0                      | 41.4                     | 18.6            |
|                        | 0.01       | 54.1           | 0                      | 35.4                     | 13.6            |
|                        | 0.02       | 38.7           | 0                      | 32.3                     | 6.4             |
|                        | 0.05       | 27.5           | 0                      | 22.6                     | 3.6             |
|                        | 0.1        | 27.6           | 0                      | 20.7                     | 3.1             |

Conditions: solvent 0.5 mL acetone/CH<sub>2</sub>Cl<sub>2</sub> (4:1, v/v), olefin 0.05 M, manganese(II) complex 1 mM, Sc(OTf)<sub>3</sub> 2 mM, PhI(OAc)<sub>2</sub> 0.1 M, 273 K, 8 h.

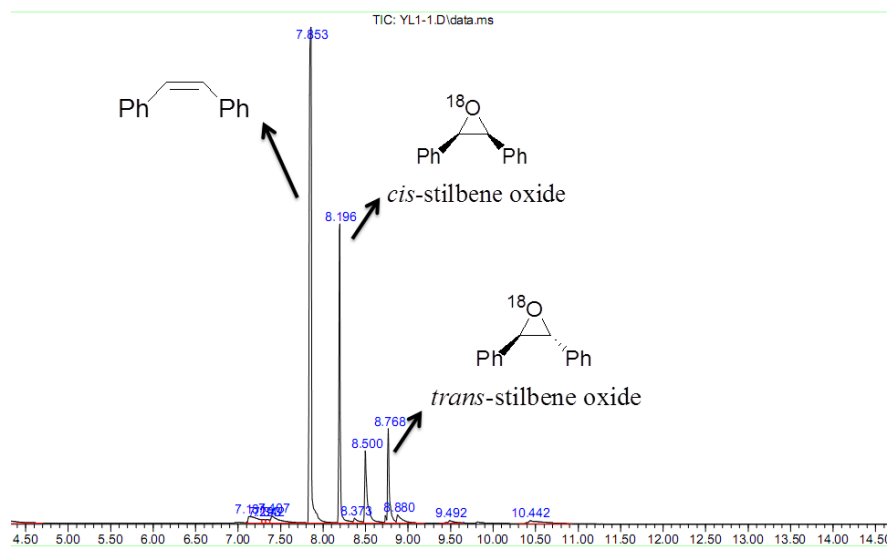

**Figure S8** GC-MS graph of H<sub>2</sub><sup>18</sup>O labeled catalytic *cis*-stilbene epoxidation by the manganese(II) complex and Sc(OTf)<sub>3</sub>. Conditions: H<sub>2</sub><sup>18</sup>O 0.1 mL, acetone 0.4 mL, CH<sub>2</sub>Cl<sub>2</sub> 0.1 mL, olefin 0.1 M, manganese(II) complex 1 mM, Sc(OTf)<sub>3</sub> 2 mM, PhI(OAc)<sub>2</sub> 0.2 M, 273 K, 8 h.

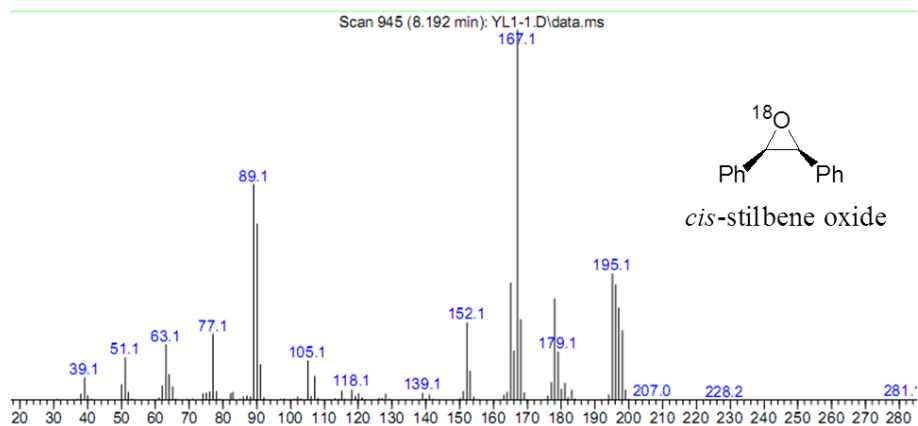

**Figure S8-1** MS graph of <sup>18</sup>O labeled *cis*-stilbene oxide from catalytic epoxidation of *cis*-stilbene by the manganese(II) complex and Sc(OTf)<sub>3</sub>.

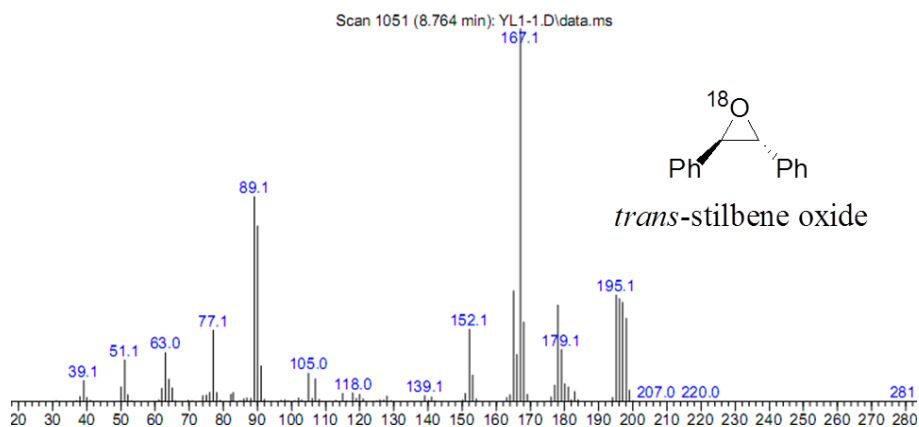

**Figure S8-2** MS graph of <sup>18</sup>O labeled *trans*-stilbene oxide from catalytic epoxidation of *cis*-stilbene by the manganese(II) complex and Sc(OTf)<sub>3</sub>.
